# Supplementary material for: Synthesis and investigation of phosphorus-free ionic liquids as multifunctional lubricating additives
Source: Royal Society of Chemistry journal article supplement (doi:10.1039/d2ra04006a), 2022-01-01
Supplement: d2ra04006a1.pdf [file d2ra04006a1.pdf]

## Synthesis and Investigation of Phosphorus-free Ionic Liquids as Multifunctional Lubricating Additives

Huaigang Su<sup>a, b, c</sup>, Qin Zhao<sup>a</sup>, Yunlong Chen<sup>a, c</sup>, Qilong Zhao<sup>a, c</sup>, Cheng Jiang<sup>a, c\*</sup>, Wenjing Lou<sup>a, c\*</sup>  
<sup>a</sup> State Key Laboratory of Solid Lubrication, Lanzhou Institute of Chemical Physics, Chinese Academy of Sciences, Lanzhou 730000, P.R. China  
<sup>b</sup> University of Chinese Academy of Sciences, Beijing 100049, P.R. China  
<sup>c</sup> Qingdao Center of Resource Chemistry and New Materials, Qingdao 266100, P.R. China

### 1. <sup>1</sup>H-NMR of synthesized NOA and NDA

The <sup>1</sup>H-NMR spectra of starting materials, synthesized NOA and NDA were recorded on a Bruker AVANCE III 400 MHz spectrometer. CDCl<sub>3</sub> was used as solvent.

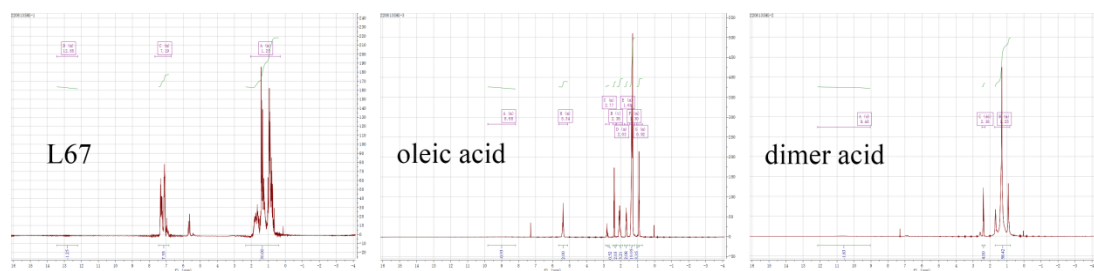

Figure S1 <sup>1</sup>H-NMR of starting materials

#### Nonylated diphenylamine (L67)

<sup>1</sup>H-NMR (400 MHz, CDCl<sub>3</sub>)  $\delta$  (ppm): 12.85 (m, 1H, -NH), 7.19 (m, 8H, arom), 0.38-2.32 (m, 30H, -CH<sub>2</sub>/-CH<sub>3</sub>)

#### Oleic acid

<sup>1</sup>H NMR (400 MHz, CDCl<sub>3</sub>)  $\delta$  (ppm): 12.85 (m, 1H, -COOH), 5.34 (m, 2H, -CH=CH-), 2.03-2.77 (m, 6H, -CH<sub>2</sub>-CO-/ -CH<sub>2</sub>-C=C), 0.92-2.03 (m, 25H, -CH<sub>3</sub>/-CH<sub>2</sub>)

#### Dimer acid

<sup>1</sup>H-NMR (400 MHz, CDCl<sub>3</sub>)  $\delta$  (ppm): 9.48 (d, 2H, -COOH), 2.38 (dd, 4H, -CH<sub>2</sub>-CO-), 0.69-1.79 (m, 58H, -CH<sub>3</sub>/-CH<sub>2</sub>)

#### NOA

<sup>1</sup>H-NMR (400 MHz, CDCl<sub>3</sub>)  $\delta$  (ppm): 7.19 (m, 8H, arom), 5.46 (m, 2H, -CH=CH-), 2.36 (m, 2H, -CH<sub>2</sub>-CO-), 0.48-2.18 (m, 59H, -CH<sub>3</sub>/-CH<sub>2</sub>)

\* Corresponding author: E-mail address: [wjlou@licp.cas.cn](mailto:wjlou@licp.cas.cn) and [jiangcheng@licp.cas.cn](mailto:jiangcheng@licp.cas.cn)

NDA

$^1\text{H-NMR}$  (400 MHz,  $\text{CDCl}_3$ )  $\delta$  (ppm): 7.14 (m, 16H, arom), 2.40 (m, 4H,  $-\text{CH}_2-\text{CO}-$ ), 0.42-2.13 (m, 119H,  $-\text{CH}_3/-\text{CH}_2$ )

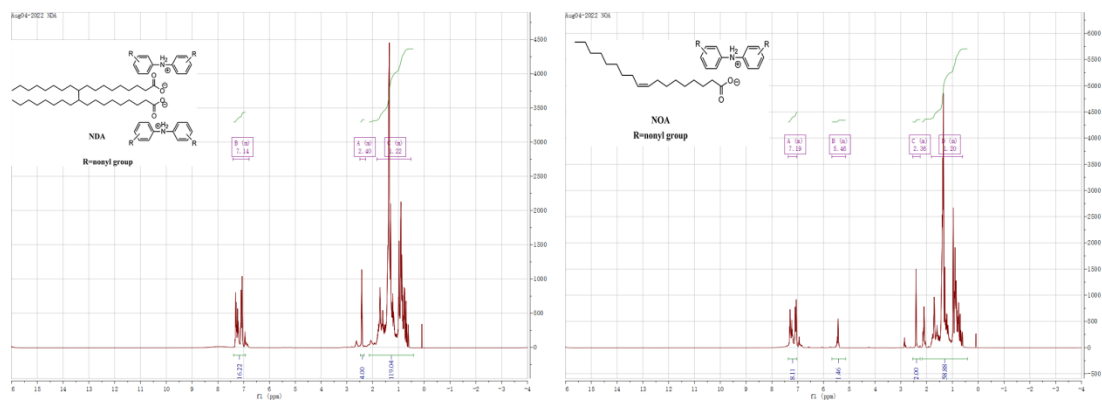

Figure S2  $^1\text{H-NMR}$  of synthesized ionic liquid

Due to the influence of hydrogen bond, the active hydrogen does not show obviously. Referring to  $^1\text{H-NMR}$  of oleic acid and dimer acid, it confirmed the existence of NDA and NOA. The complex peak in  $\delta=1-2$  is due to the impurities from Nonylated diphenylamine (L67), because L67 is a commercial sale mixture.
